1 Sift-PULs: A public repository for specific functional polysaccharide utilization loci  
2 Tao Song<sup>1\*</sup>, Congchong Wei<sup>1</sup>, Dezhi Yuan<sup>2</sup>, Shengwei Xiang<sup>1</sup>, Lin Liu<sup>1</sup>, Hua Lv<sup>1</sup>, Binkai  
3 Wang<sup>1</sup>, Ting Huang<sup>1</sup>, Kelei Zhao<sup>1</sup>, Xinrong Wang<sup>1</sup>, Yiwon Chu<sup>1</sup>, Jiafu Lin<sup>1\*</sup>

4 1: Antibiotics Research and Re-evaluation Key Laboratory of Sichuan Province, Sichuan  
5 Industrial Institute of Antibiotics, School of pharmacy, Chengdu University, 610106,  
6 Chengdu, China

7 2: Moutai Institute, Renhuai 564500, Guizhou Province, China

8 \*: Corresponding authors of this paper

9

10

11

12

13

14

15 **Corresponding author:**

16 Tao Song and Jiafu Lin

17 Sichuan Industrial Institute of Antibiotics,

18 Chengdu University, Chengdu, 610106, P. R. China

19 Tel: +86-028-84216083, Fax: +86-028-84216083

20 E-mail: [songtao@cdu.edu.cn](mailto:songtao@cdu.edu.cn), [linjiafu@cdu.edu.cn](mailto:linjiafu@cdu.edu.cn)

21 **Abstract**

22 Background

23 Polysaccharide utilization loci (PULs) were bacterial gene clusters encoding genes responsible for  
24 polysaccharide utilization process. PUL studies are blooming in recent years but the biochemical  
25 characterization speed is relative slow. There is a growing demand for PUL database with function  
26 annotations.

27 Results

28 Using signature genes corresponding for specific polysaccharide, 10422 PULs specific for 6  
29 polysaccharides (agar, alginate, pectin, carrageenan, chitin and  $\beta$ -mannan) from various bacterial phyla  
30 were predicted. Then online website of specific functional polysaccharide utilization loci (Sift-PULs) was  
31 constructed. Sift-PULs provides a repository where users could browse, search and download interested  
32 PULs without registration.

33 Conclusions

34 The key advantage of Sift-PULs is to assign a function annotation of each PUL, which is not available in  
35 existing PUL databases. PUL's functional annotation lays a foundation for studying novel enzymes, new  
36 pathways, PUL evolution or bioengineering. The website is available on <http://sift-puls.org>

37

38 **Keywords:** Polysaccharide utilization loci; Database; Function annotation

39 **Introduction**

40 PUL s(polysaccharide utilization loci) are bacterial gene clusters that encoding a variety of functional  
41 genes responsible for the transcription, degradation, transport and metabolism of polysaccharides  
42 (Grondin *et al.*, 2017). Since the discovery of starch PUL (also named as Sus. starch utilization system)  
43 from *Bacteroides thetaiotaomicron*, more and more PULs have been found from different ecosystems  
44 and various bacteria phyla (D'Elia and Salyers, 1996; Foley *et al.*, 2016; Chen *et al.*, 2018; Despres *et al.*,  
45 2016; Grondin *et al.*, 2017). Discovered PULs are found to target at many different types of  
46 polysaccharides, including xylan,  $\beta$ -mannan or pectin (Tang *et al.*, 2017; Bagenholm *et al.*, 2017; Reddy  
47 *et al.*, 2016; Ficko-Blean *et al.*, 2017; Despres *et al.*, 2016; Pluvinage *et al.*, 2018). Now PUL studies are  
48 becoming a hotspot because their significant importance in ecology, evolution and  
49 bioengineering(Grondin *et al.*, 2017). Although PULs have important biological functions, biochemical  
50 identification in laboratory is too slow, resulting in number scarcity and hindering the progress of PUL  
51 study.

52 In view of the sparse data of PULs and PULs' significant biological functions, it is very necessary to  
53 use bioinformatics way to identify PULs. There are currently three PUL databases available, including  
54 PULDB, CGCs and dbCAN-PUL(Terrapon *et al.*, 2015; Zhang *et al.*, 2018; Ausland *et al.*, 2021). PULDB  
55 is the first PUL database, which uses SusC/D gene pair and carbohydrate active enzymes for prediction.  
56 It mainly includes PULs from *Bacteroidetes*. CGCs predict PULs using transcription factors, transport

57 proteins and carbohydrate active enzymes while dbCAN-PUL does not predict PULs but provides  
58 experimentally confirmed PULs. It is worth mentioning that although these three databases provide PUL  
59 collections, there is no annotation for predicted PULs. So researchers who want to find PULs targeting at  
60 specific polysaccharide need to manually check the predicted PULs. This is very laborious. PUL with a  
61 function annotation is helpful for researchers to answer new hypotheses and provide a basis for new  
62 discoveries. With the increase of PUL studies, the requirement of PUL database with specific function  
63 annotations has become more and more urgent. Unfortunately, there is no PUL database providing  
64 specific function annotation now.

65 PULDB and CGCs are the two main databases currently used for PUL prediction, and no functional  
66 prediction is given for the predicted PULs. Therefore, we used signature genes corresponding to 6  
67 different polysaccharides (agar, alginate, pectin, carrageenan, chitin and  $\beta$ -mannan) to predict PULs, and  
68 gave function predictions. Then Sift-PULs website is constructed, where users could easily search and  
69 download interested Sift-PULs. Sift-PULs serves as repository for researchers who focus on one specific  
70 polysaccharide and need large scale data to discover novel protein, utilization pathways or evolutionary  
71 process.

## 72 **Materials and methods**

### 73 Data retrieval

74 Bacterial genomes were mainly downloaded from NCBI database (download was finished in  
75 2021.03.01). Genomes at different assemble levels (contig, scaffold, complete or chromosome) were  
76 downloaded using a home-made script. Only GBFF format file were retrieved from FTP link.

### 77 Data normalization

78 The genbank file of a bacterial genome was parsed using Biopython package, then protein  
79 sequences within bacterial genome were extracted into a single fasta file. The name of each protein is  
80 normalized into following format: GCF number of genome, contig name, serial number on the contig,  
81 gene start position, gene end position and gene direction. Therefore, protein name was a unique  
82 signature which contained essential information for prediction.

### 83 Selection of signature gene

84 In total, PULs that were specific for alginate, agar, carrageenan, chitin,  $\beta$ -mannan and pectin  
85 (polygalacturonicacid) were considered in this manuscript. In this study, signature genes were classified  
86 into two categories, core genes and alternative genes (Supplementary material 1). Core genes referred  
87 to genes that were essential for the polysaccharide utilization process, including ones responsible for  
88 monosaccharide metabolism (e.g. unique 3,6 anhydro-L galactose metabolic genes for agar) or unique  
89 metabolic process (e.g. GH130 mannoibiose phosphorylase for mannan utilization). Core genes were  
90 determined if they were commonly found in most biochemically PULs. Alternative genes were usually  
91 carbohydrate active enzymes responsible for polysaccharide utilization. Alternative genes were

92 determined if they appeared in characterized PULs or their activities were related to polysaccharide  
93 degradation.

94 Hmmer model build

95 Most hmmer models responsible for signature genes were built locally. To build an hmmer model,  
96 experimentally validated protein sequences were first collected and aligned using MUSCLE(Edgar, 2004),  
97 followed by manual correction. Proteins with experimental evidences from CAZyS and Unipro were used  
98 as test data to test the true positive rate and false positive rate. The re-build hmmer model should  
99 have >95% true positive rate and <5% false positive rate under a specific threshold. When the signature  
100 gene was from a family with only one enzyme activity and this family had very few experimentally  
101 confirmed members (less than 3), the corresponding hmmer model was retrieved from Pfam and dbCAN  
102 (Finn *et al.*, 2013; Zhang *et al.*, 2018).

103 Sift-PULs prediction

104 Sift-PUL prediction needed 6 steps:

- 105 (1) Firstly, normalized protein fasta file was analyzed using Hmmer against corresponding models.  
106 If domain of a gene was the same as core gene or alternative gene, it was recorded as core  
107 gene or alternative gene, respectively.
- 108 (2) Then, we investigated whether it was possible to put core genes and at least one alternative  
109 gene into a gene cluster with less than 50 genes. If did, serial numbers of matched core genes or  
110 alternative genes were recorded.
- 111 (3) Minimum PUL was defined as gene cluster contained minimum members including all core  
112 genes and at least one alternative gene. Extended the minimum PUL to both sides until the gene  
113 number reached 50. Then extended PUL was defined as maximum PUL.
- 114 (4) Calculate the frequency of individual domain in minimum PULs. Domains with >10% frequency  
115 were defined as high frequency domain.
- 116 (5) PUL boundary of minimum PUL was extended until the adjacent and consecutive 5 genes did  
117 not have high frequency domain. If the extended PULs were smaller than maximum PUL,  
118 extended boundary was used. Otherwise, maximum PUL boundary was used.

119 Online database construct

120 The website of Sift-PULs was constructed using Vue.js (javascript) and Django (python). Database  
121 is implemented using PostgreSQL.

## 122 **Result and discussion**

### 123 **Data collections of Sift-PULs**

124 PULs are bacterial gene clusters that have essential biological functions. Considering increasing  
125 interest of researchers in PUL study and PULs' slow identification in laboratory, it is necessary to

126 establish a PUL database with function prediction. Using signature genes that specific to corresponding  
127 polysaccharide, 10422 PULs were identified, including 2347 pectin PULs, 1140 manan PULs, 1938  
128 alginate PULs, 4723 chitin PULs, 186 agar PULs and 88 carrageenan PULs (Fig 1A). Meanwhile,  
129 predicted PULs came from different phyla including *Proteobacteria* (4140 PULs), *Firmicutes* (3335 PULs),  
130 *Bacteroidetes* (2342 PULs) and *Actinobacteria* (537 PULs). Noteworthy, Sift-PULs showed a potent as a  
131 reference database for discovering novel PULs. For example, predicted carrageenan PULs came from 5  
132 phyla (*Actinobacteria*, *Bacteroidetes*, *Planctomycetes*, *Proteobacteria* and *Firmicutes*), and now only  
133 carrageenan from *Bacteroidetes* was experimentally verified. Moreover, bacterial genomes above contig  
134 level were used for sift-PULs prediction in this study, therefore most predicted sift-PULs come from  
135 bacteria had contig or scaffold genomes (Fig 1B).

136 In current study, hmmer models were locally built to ensure signature genes' specificity, then  
137 combination of signature genes was used for PUL's function prediction. Still, it was possible that our  
138 predicted results may contain false positives.

139 To investigate the data reliability of predicted sift-PULs, firstly, we tried to evaluate the prediction  
140 method to give hint about data accuracy. However, it did not succeed because of insufficient number of  
141 experimentally confirmed PULs. For example, there was only one report of carrageenan PUL, 2 reports  
142 of agar PULs, less than 10 reports of pectin PULs. Then, we tried to find evidence in database containing  
143 bacterial polysaccharide utilization information (biodive). However, bacteria with sift-PULs were either not  
144 recorded in biodive database, or corresponding polysaccharide utilization information was not recorded.  
145 Matched results were too few to get any useful conclusions. In the end, we focused on bacteria with  
146 agar-PULs. This was because agar was commonly used in bacterial cultivation for almost 100 years,  
147 agar degradation phenotype could be easily seen on plate, and this information was more likely to be  
148 recorded in literature. Surprisingly, 70 out of 186 bacteria with predicted agar PULs could degrade agar  
149 and the rest were not mentioned (Supplementary material 2). This implied the predicted agar PULs were  
150 relative reliable. The accuracy of agar PULs also indicated sift-PULs could be used as reference  
151 databank for researchers.

## 152 **Comparison with existing PUL databases**

153 Using signature genes to predict PUL was commonly in current research(Terrapon *et al.*, 2015;  
154 Zhang *et al.*, 2018). For example, SIFT-PULS used the PUL conservative SusC/D gene pair and  
155 carbohydrate active enzymes, and CGCs used transcription factors, sugar transporters and carbohydrate  
156 active enzymes. The signature genes used in prediction determine the properties of the obtained PUL.  
157 For example, the PULs in SIFT-PULS only came from *Bacteroidetes*, because the SusC/D gene pair was  
158 mainly derived from *Bacteroidetes*. Because the selected signature genes are not specific to  
159 polysaccharides in PULDB or CGCs, none of these two databases could give function prediction. The  
160 signature genes used in Sift-PULs in this article were specific to each polysaccharide, therefore function  
161 annotation was possible. The function prediction greatly reduced the workload of researchers searching  
162 for the corresponding function PUL.

163 Sift-PULs included 10422 PULs, which less than with 43156 PULs in PULDB (Table 1). This was  
164 probably because sift-PULs only focus on 6 polysaccharides. Meanwhile, PULs from Sift -PULS were

165 from multiple bacterial phyla. This was similar to CGCs but different with sift-PULS, in which only  
166 *Bacteroidetes* was considered. Compared with sift-PULs and CGCs, the most important feature of  
167 Sift-PULs was that it could give function predictions.

## 168 **Web interface**

169 At the start page of sift-PULs, there were six sections: home, search, browse, download, links and  
170 help (Fig 1A). At home page, there was a brief introduction of sift-PULs, where users could quickly learn  
171 how sift-PULs were predicted. Important update would also be showed here. User could find interested  
172 sift-PULs in two ways. First, in the search section, users could search for interested PULs using different  
173 keywords, for example polysaccharide name, taxid, GCF number, phylum name, species name or  
174 protein domain name (Fig 1B). Second, in browse section, sift-PULs were classified by polysaccharide or  
175 phyla (Fig 1C). By clicking the search button in search section or links in browse section, interested  
176 sift-PULs would be displayed (Fig 1D). After clicking 'view' button interested PUL, PUL information would  
177 be displayed in a pop-up page, which contains the PUL information, download option, gene cluster map  
178 and gene information(Fig 1E)..

179 Sift-PULs also provide batch download service, which was convenient for users who required large  
180 amount of data. In download section, users could easily download all sift-PULs data (Fig 1F). There were  
181 three format files available, including a genbank file that included complete DNA sequence of PUL, DNA  
182 fasta file that included DNA sequences for individual CDS, protein fasta file that included protein  
183 sequences for individual CDS. Users could download these files when browsing individual PUL.

## 184 **Conclusions**

185 Sift-PULs website provides a public repository where users could easily access, search and  
186 download PULs with specific function annotation, which helps researchers to build a local database and  
187 come up with novel hypothesis. For example, Sift-PULs could help biochemists discover novel enzymes  
188 (study proteins that are not characterized but have high frequency score) and find novel degradation  
189 pathways. In future, Sift-PULs would update once a year. Update would include sift-PULs from newly  
190 sequenced genomes or sift-PULs targeting at new polysaccharides (e.g.  $\alpha$ -mannan, starch and ulvan).  
191 Online prediction service of sift-PULs is also under construction.

## 192 **Declaration**

193 -Abbreviations (if applicable)

194 PULs: polysaccharide utilization loci

195 -Ethics approval and consent to participate

196 Not applicable

197 -Consent for publication

198 Not applicable

199 -Availability of data and materials

200 Not applicable

201 -Funding

202 This work was supported by the Sichuan Science and Technology Program (Grant Number:  
203 2019YJ0282); Collaboration and Innovation on New Anti-biotic Development and Industrialization (Grant  
204 Number: 2016-XT00-00023-G); Major New Drugs Innovation and Development (Grant Number:  
205 2018ZX09711-001); The talent Introduction of Project of Chengdu University (2081918021) and Key  
206 Laboratory of Coarse Cereal Processing, Ministry of Agriculture and Rural Affairs (2020CC009).

207 Publishing cost was funded by Antibiotics Research and Re-evaluation Key Laboratory of Sichuan  
208 Province (Grant Number: ARRLKF19-01, ARRLKF19-05); The Science and technology projects from  
209 Department of Ecology and Environment of Sichuan Province (Grant No. 2019HB16).

210 -Competing Interests

211 We declare that we have no competing interest.

212 -Authors' contributions

213 TS: conceptualization, writing- reviewing and editing; CW and DY: website construction and maintain; SX,  
214 LL and H: visualization, development or design of methodology; BW and XZ: data analysis and  
215 visualization; XZ and TH: data curation; KZ: project administration; XW: funding acquisition; YC: funding  
216 acquisition and writing- reviewing; JL: conceptualization, writing- reviewing and editing, supervision. All  
217 authors have read and approved the manuscript.

218 -Acknowledgements

219 We thank Dr. Jan Hendrik Hehemann (Max Planck Institute for Marine Microbiology) for his critical  
220 comments on polysaccharide utilization pathways.

## 221 Reference

222 Ausland,C. *et al.* (2021) dbCAN-PUL: a database of experimentally characterized CAZyme gene clusters  
223 and their substrates. *Nucleic Acids Res.*, **49**, D523–D528.

224 Bagenholm,V. *et al.* (2017) Galactomannan catabolism conferred by a polysaccharide utilisation locus of  
225 *Bacteroides ovatus* : enzyme synergy and crystal structure of a  $\beta$ -mannanase. *J. Biol. Chem.*, **292**,  
226 229–243.

227 Chen,J. *et al.* (2018) Alpha - and beta - mannan utilization by marine Bacteroidetes. *Environ. Microbiol.*,  
228 **20**, 4127–4140.

229 D'Elia,J.N. and Salyers,A.A. (1996) Effect of regulatory protein levels on utilization of starch by  
230 *Bacteroides thetaiotaomicron*. *J. Bacteriol.*, **178**, 7180–7186.

231 Despres,J. *et al.* (2016) Xylan degradation by the human gut *Bacteroides xylanisolvens* XB1AT involves  
232 two distinct gene clusters that are linked at the transcriptional level. *BMC Genomics*, **17**, 326.

- 233 Edgar,R.C. (2004) MUSCLE: multiple sequence alignment with high accuracy and high throughput.  
234 *Nucleic Acids Res.*, **32**, 1792–1797.
- 235 Ficko-Blean,E. *et al.* (2017) Carrageenan catabolism is encoded by a complex regulon in marine  
236 heterotrophic bacteria. *Nat. Commun.*, **8**, 1685.
- 237 Finn,R.D. *et al.* (2013) Pfam: The protein families database. *Nucleic Acids Res.*, **42**, D222–D230.
- 238 Foley,M.H. *et al.* (2016) The Sus operon: a model system for starch uptake by the human gut  
239 Bacteroidetes. *Cell. Mol. Life Sci.*, **73**, 2603–2617.
- 240 Grondin,J.M. *et al.* (2017) Polysaccharide utilization loci: Fueling microbial communities. *J. Bacteriol.*,  
241 **199**, e00860-16.
- 242 Pluvinage,B. *et al.* (2018) Molecular basis of an agarose metabolic pathway acquired by a human  
243 intestinal symbiont. *Nat. Commun.*, **9**, 1043.
- 244 Reddy,S.K. *et al.* (2016) A  $\beta$  - mannan utilization locus in *Bacteroides ovatus* involves a GH36  
245  $\alpha$  - galactosidase active on galactomannans. *FEBS Lett.*, **590**, 2106–2118.
- 246 Tang,K. *et al.* (2017) Characterization of potential polysaccharide utilization systems in the marine  
247 Bacteroidetes *Gramella flava* JLT2011 using a multi-omics approach. *Front. Microbiol.*, **8**.
- 248 Terrapon,N. *et al.* (2015) Automatic prediction of polysaccharide utilization loci in Bacteroidetes species.  
249 *Bioinformatics*, **31**, 647–655.
- 250 Zhang,H. *et al.* (2018) dbCAN2: a meta server for automated carbohydrate-active enzyme annotation.  
251 *Nucleic Acids Res.*, **46**, W95–W101.
- 252



253 Table 1 Comparison Sift-PULDB with PULDB and CGCs, N.A.: not available

|                         | PULDB            | CGCs                                        | Sift-PULs                              |
|-------------------------|------------------|---------------------------------------------|----------------------------------------|
| Signature Genes         | SusC/D and CAZys | Transcription factor, transporter and CAZys | Specific genes for each polysaccharide |
| PUL numbers             | 43156            | N.A.                                        | 10422                                  |
| Multiple phyla          | No               | Yes                                         | Yes                                    |
| Bacteria assemble level | Complete         | Complete                                    | above contig                           |
| Function prediction     | No               | No                                          | yes                                    |

254

255

256

257 **Figure legends:**

258 Figure 1 summary of predicted sift-PULs. A: phyla distribution of bacteria with predicted sift-PULs. B:  
259 Assemble level of bacteria with predicted sift-PULs.

260 Figure 2: Screenshots of sift-PULs website. A: Menu in sift-PULs website link to different sections. B:  
261 Search section in sift-PULs website. Users could search sift-PULs by phyla, species name, txa id and  
262 domain name. C: Browse section in sift-PULs website. Sift-PULs were classified by polysaccharide or  
263 phyla. D: Screenshot of sift-PULs list after user click search or browse button. E: Web interface for a  
264 sift-PUL using a alginate PUL as an example. F: Web interface for batch download.

**A**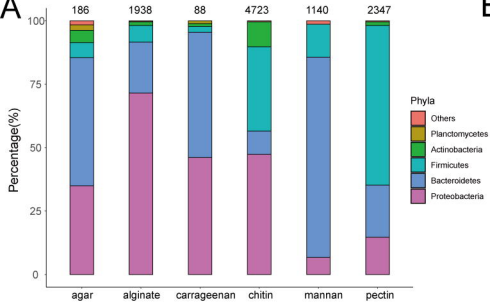**B**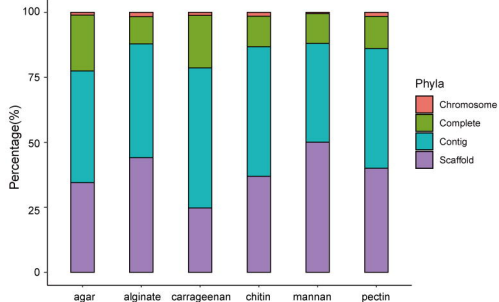

A

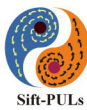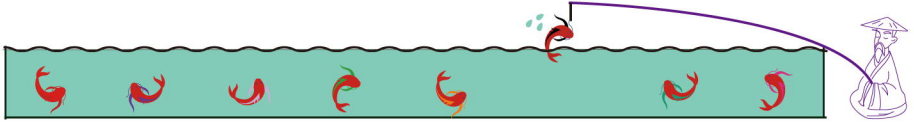

Home

Search

Browse

Download

Links

Help

→ 6 sections

B

## Search section

Search by PUL type

eg. Agar, Alginate, Carrageenan, Chitin, Mannan, Pectin



Search by Taxonomy

eg. 203122






eg. *Acetobacter cibrongensis*



eg. Actinobacteria, Bacteroidetes, Firmicutes



Search by domain name

eg. ABC\_tran, BPD\_nansp\_f



C

## Browser section

Polysaccharide

alginate **1938** PULs  
 agar **186** PULs  
 mannan **1140** PULs  
 chitin **4723** PULs  
 pectin **2347** PULs  
 carrageenan **88** PULs

Phylum

Acidobacteria **4** PULs  
 Actinobacteria **537** PULs  
 Bacteroidetes **2342** PULs  
 Balneolaeota **1** PULs  
 Chloroflexi **2** PULs  
 Cyanobacteria **1** PULs  
 Dictyoglomi **2** PULs  
 Firmicutes **3335** PULs  
 Fusobacteria **5** PULs

D

1938 results are found

| PUL Type | PUL ID      | GCF Number    | Organism Name                                | Phylum         | Action                                        |
|----------|-------------|---------------|----------------------------------------------|----------------|-----------------------------------------------|
| alginate | alginate_2  | GCF_000014225 | <i>Pseudoalteromonas atlantica</i> T6c       | Proteobacteria | <a href="#">View</a> <a href="#">Download</a> |
| alginate | alginate_1  | GCF_000013665 | <i>Saccharophagus degradans</i> 2-40         | Proteobacteria | <a href="#">View</a> <a href="#">Download</a> |
| alginate | alginate_3  | GCF_000014745 | <i>Maricaulis maris</i> MCS10                | Proteobacteria | <a href="#">View</a> <a href="#">Download</a> |
| alginate | alginate_4  | GCF_000020665 | <i>Slenotrophomonas maltophilia</i> R551-3   | Proteobacteria | <a href="#">View</a> <a href="#">Download</a> |
| alginate | alginate_5  | GCF_000023785 | <i>Hirshchia bellica</i> ATCC 49814          | Proteobacteria | <a href="#">View</a> <a href="#">Download</a> |
| alginate | alginate_6  | GCF_000024685 | <i>Paenibacillus</i> sp. Y412 MC10           | Firmicutes     | <a href="#">View</a> <a href="#">Download</a> |
| alginate | alginate_7  | GCF_000024845 | <i>Rhodothermus marinus</i> DSM 4252         | Bacteroidetes  | <a href="#">View</a> <a href="#">Download</a> |
| alginate | alginate_8  | GCF_000026085 | <i>Pseudoalteromonas haloplanktis</i> TAC125 | Proteobacteria | <a href="#">View</a> <a href="#">Download</a> |
| alginate | alginate_9  | GCF_000060345 | <i>Gramella forsteri</i> KT68 03             | Bacteroidetes  | <a href="#">View</a> <a href="#">Download</a> |
| alginate | alginate_10 | GCF_000072485 | <i>Slenotrophomonas maltophilia</i> K279a    | Proteobacteria | <a href="#">View</a> <a href="#">Download</a> |

E

## PUL information

Taxonomy: Bacteria / Proteobacteria / Gammaproteobacteria / Alteromonadales / Pseudoalteromonadaceae

| PUL Type | PUL ID     | GCF Number    | Taxonomy ID | Assembly Level  | Gene Number | PUL Start | PUL End |
|----------|------------|---------------|-------------|-----------------|-------------|-----------|---------|
| alginate | alginate_2 | GCF_000014225 | 342610      | Complete Genome | 36          | 4365762   | 4418088 |

Download: [DNA](#) [Protein](#) [Genbank](#)

## PUL genes

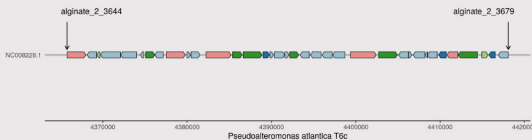

## PUL content

| Gene ID         | Gene Name                     | Domains                     | Classification                             | Gene Start | Gene End |
|-----------------|-------------------------------|-----------------------------|--------------------------------------------|------------|----------|
| alginate_2_3644 | NC008228.1_4365762_4418088.24 | Plug<br>TonB_dep_Rec        | sugar transporter or sugar binding protein | 4365762    | 4367997  |
| alginate_2_3645 | NC008228.1_4365762_4418088.4  | Aminotran_1_2               | UNKNOWN                                    | 4368141    | 4369269  |
| alginate_2_3646 | NC008228.1_4365762_4418088.29 | Response_reg                | TF                                         | 4369288    | 4369978  |
| alginate_2_3647 | NC008228.1_4365762_4418088.8  | DNA_poi_B<br>DNA_poi_B_exo1 | UNKNOWN                                    | 4369731    | 4372069  |
| alginate_2_3648 | NC008228.1_4365762_4418088.12 | GGDEF<br>TPR_12             | UNKNOWN                                    | 4372108    | 4373992  |
| alginate_2_3649 | NC008228.1_4365762_4418088.9  | DUF3718                     | UNKNOWN                                    | 4374452    | 4374848  |
| alginate_2_3650 | NC008228.1_4365762_4418088.11 | GFO_IDH_MocA<br>GH109_nhm   | carbohydrate active enzymes                | 4375083    | 4376163  |

F

## Download section

Batchly download all sift-PULs

Download all PUL data

[DNA](#) [Protein](#) [Genbank](#)

Batchly download a certain type sift-PULs

Download by polysaccharide

[Agar](#)[Alginate](#)[Carrageenan](#)[Chitin](#)[Mannan](#)[Pectin](#)

PUL information

Download options

Gene organization

Gene information
